# Supplementary material for: iRhom2-mediated proinflammatory signalling regulates heart repair following myocardial infarction
Source: PubMed Central journal article supplement (PMC5821194; doi:10.1172/jci.insight.98268), 2018-02-08
Supplement: jciinsight-3-98268-s001.pdf [file jciinsight-3-98268-s001.pdf]

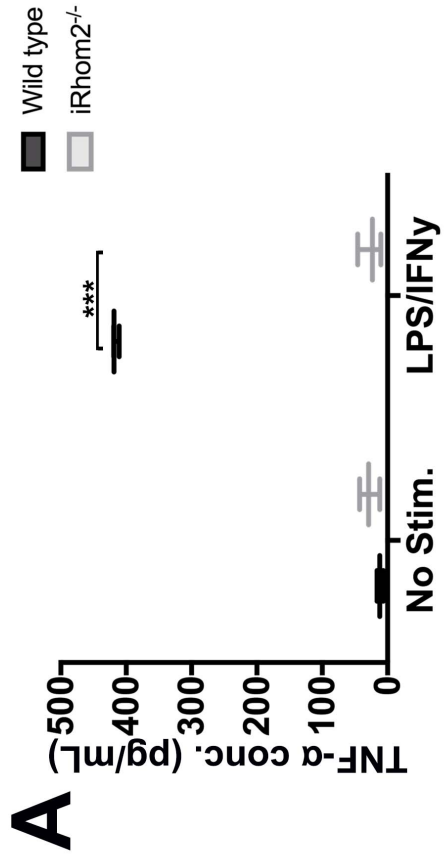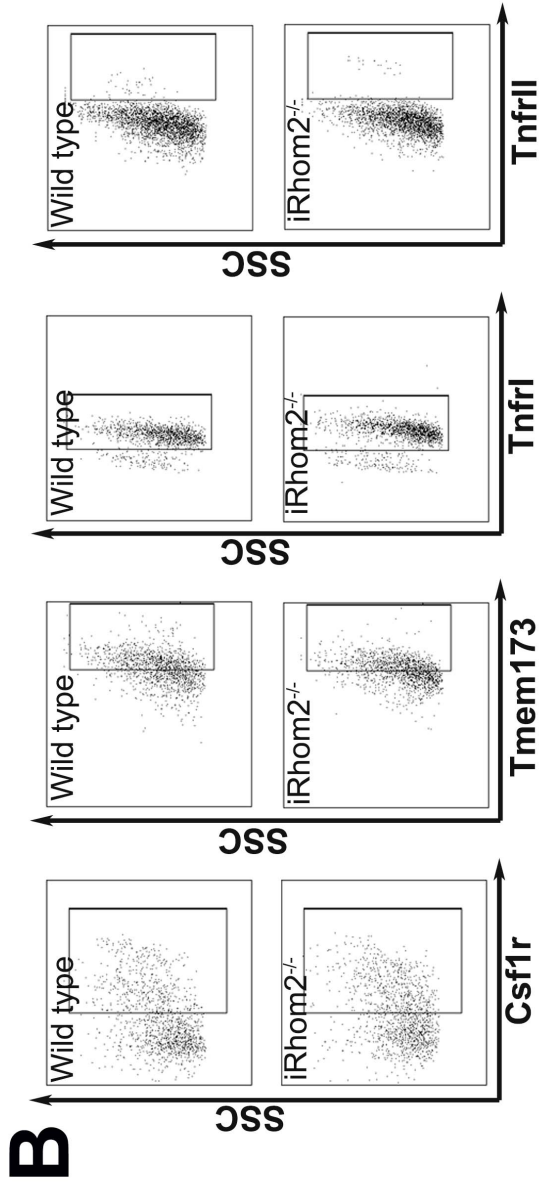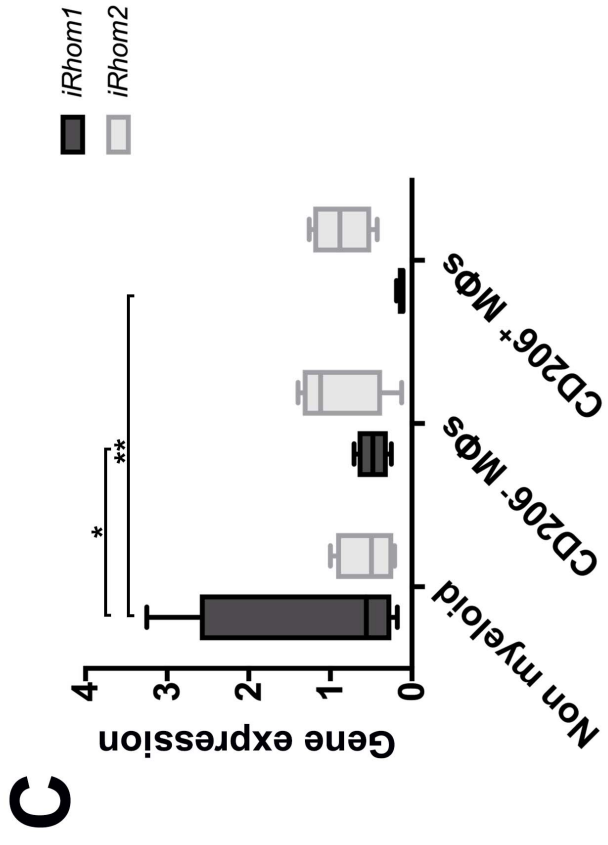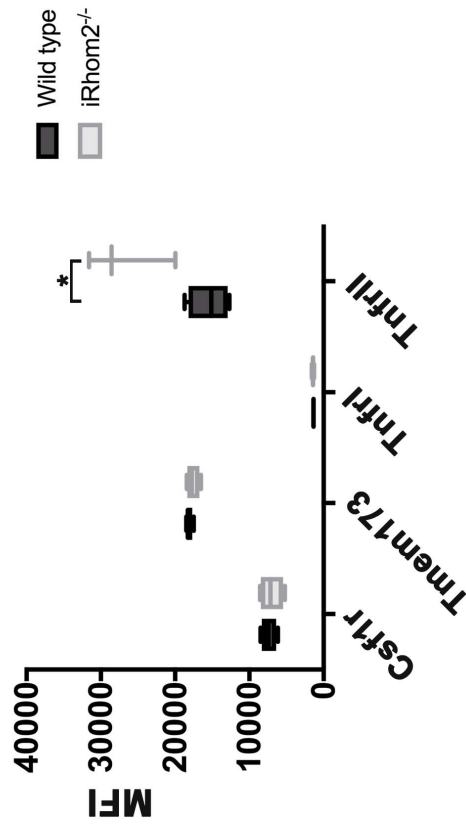

Barnette et al\_Supplemental Figure 1

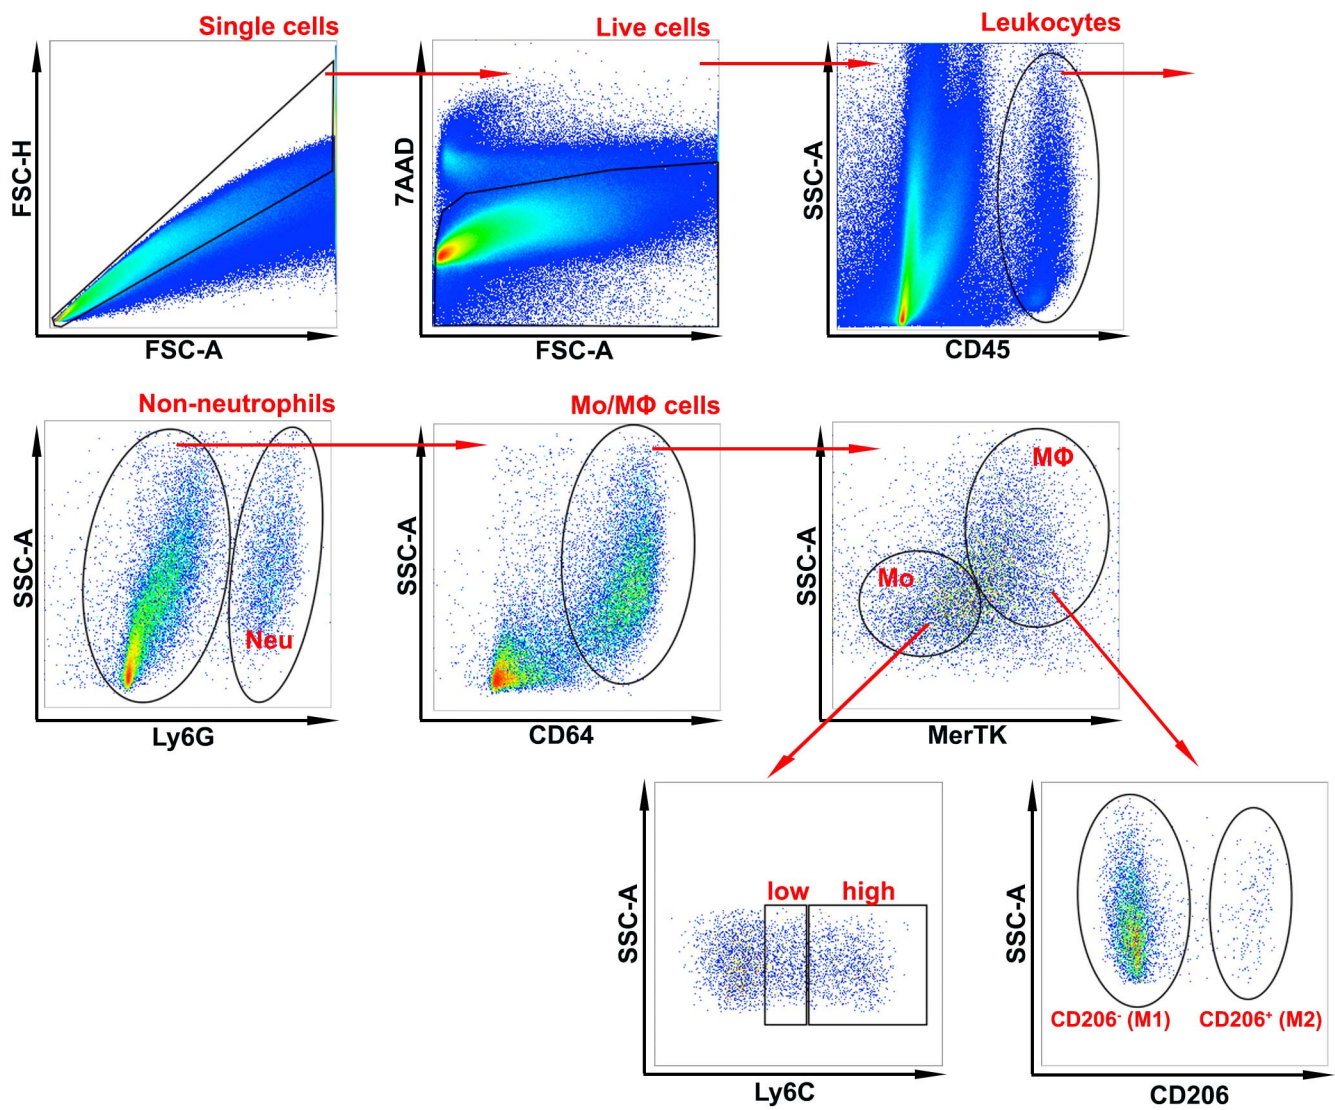

Barnette et al\_Supplemental Figure 2

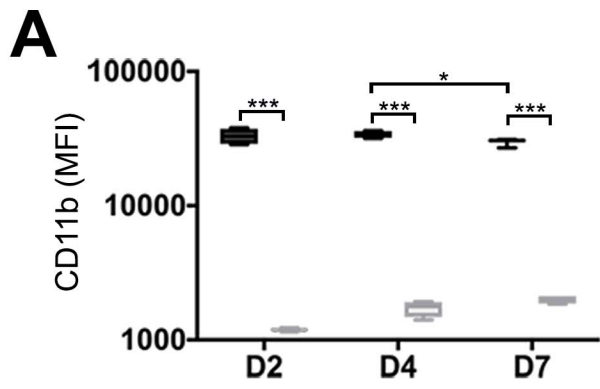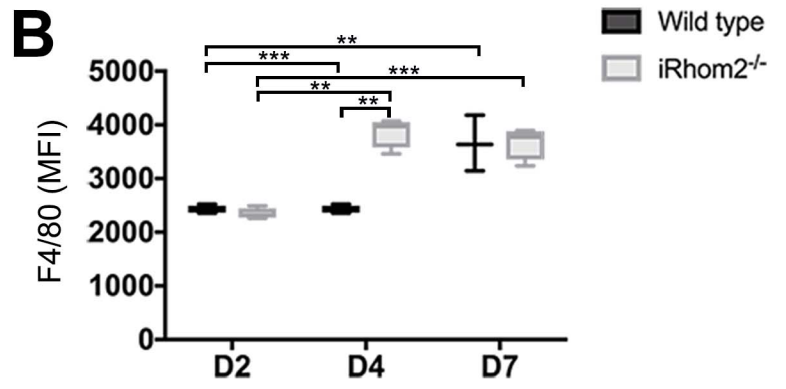

Barnette et al\_Supplemental\_Figure\_3

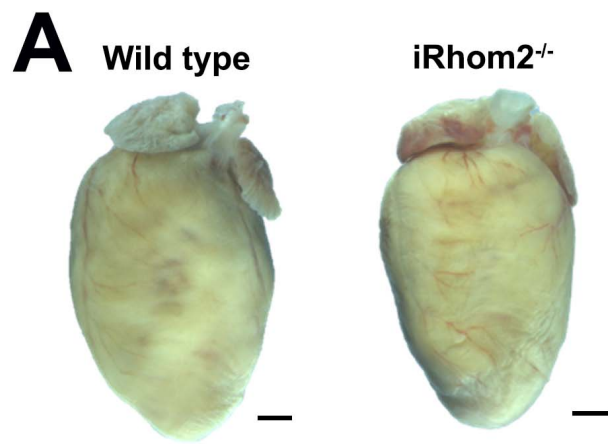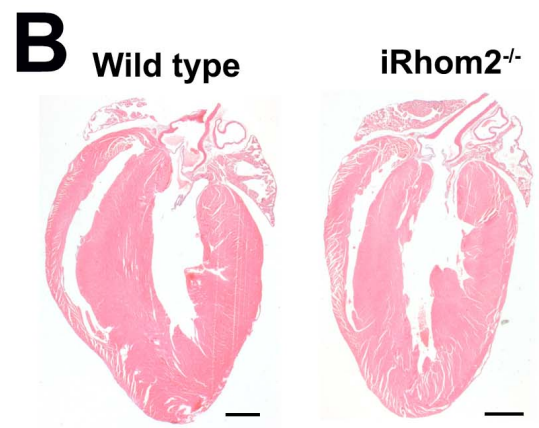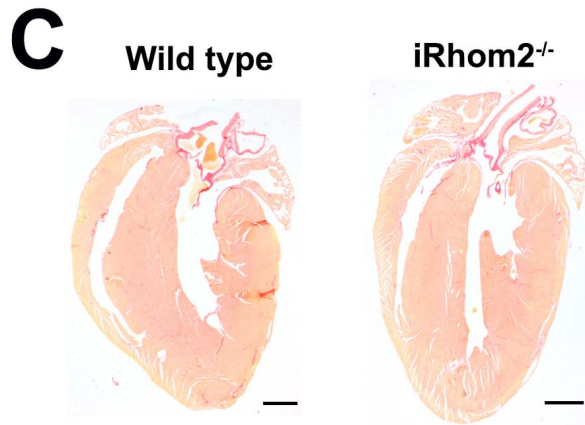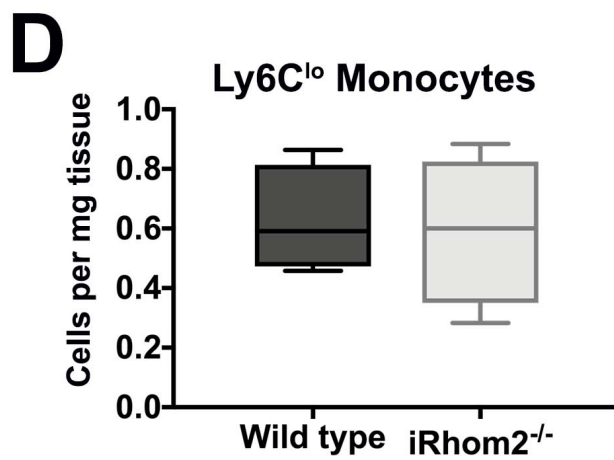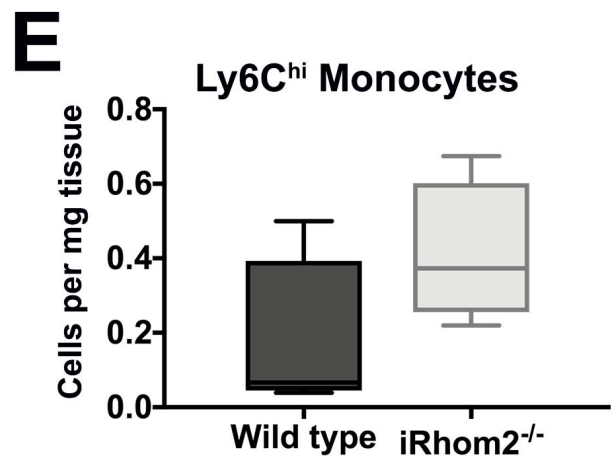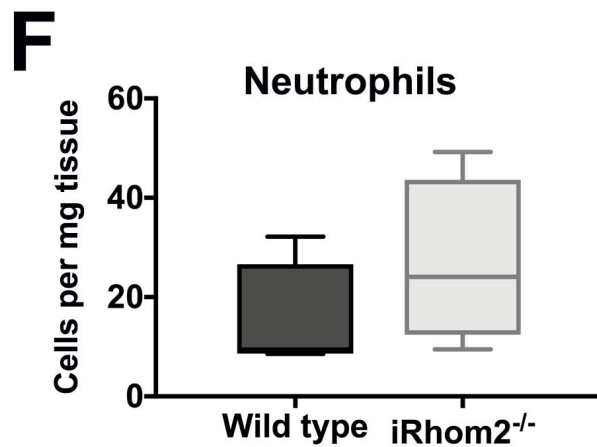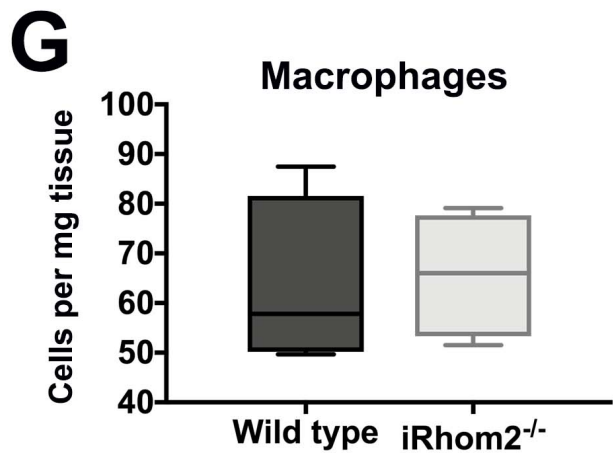

**A**

Wild type

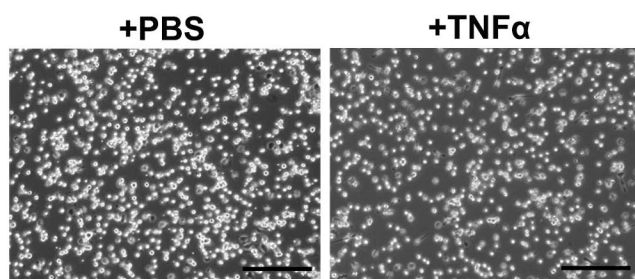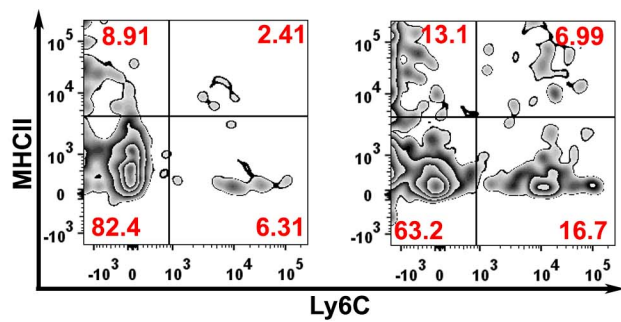**B***iRhomb2*<sup>-/-</sup>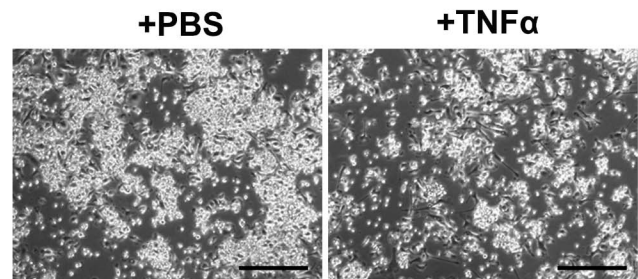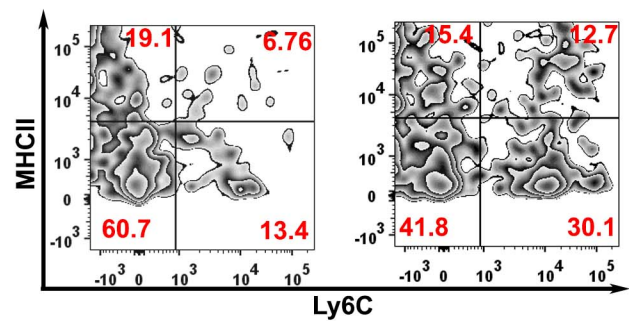

Barnette et al\_Supplemental Figure 5
